# Supplementary material for: Investigation of the Genomic and Pathogenic Features of the Potentially Zoonotic Streptococcus parasuis
Source: MDPI journal article supplement (doi:10.3390/pathogens10070834), 2021-07-02
Supplement: s1 [file s1]

Table S2. Survival table of each infected group and statistical data in survival assay.

| Survival table |    |      |                                     |                                                   |                |                   |                    |
|----------------|----|------|-------------------------------------|---------------------------------------------------|----------------|-------------------|--------------------|
|                | Id | Time | Status<br>(0: dead; 1:<br>survival) | Cumulative proportion of<br>survival at this time |                | Cumulative events | Remaining<br>cases |
|                |    |      |                                     | Estimate                                          | Standard error |                   |                    |
| BS26 1         | 21 | 8    | 0                                   | .095                                              | .049           | 1                 | 19                 |
| 2              | 22 | 10   | 0                                   | .                                                 | .              | 2                 | 18                 |
| 3              | 23 | 10   | 0                                   | .850                                              | .080           | 3                 | 17                 |
| 4              | 24 | 12   | 0                                   | .800                                              | .089           | 4                 | 16                 |
| 5              | 25 | 18   | 0                                   | .                                                 | .              | 5                 | 15                 |
| 6              | 26 | 18   | 0                                   | .                                                 | .              | 6                 | 14                 |
| 7              | 27 | 18   | 0                                   | .                                                 | .              | 7                 | 13                 |
| 8              | 28 | 18   | 0                                   | .                                                 | .              | 8                 | 12                 |
| 9              | 29 | 18   | 0                                   | .                                                 | .              | 9                 | 11                 |
| 10             | 30 | 18   | 0                                   | .                                                 | .              | 10                | 10                 |
| 11             | 31 | 18   | 0                                   | .                                                 | .              | 11                | 9                  |
| 12             | 32 | 18   | 0                                   | .                                                 | .              | 12                | 8                  |
| 13             | 33 | 18   | 0                                   | .                                                 | .              | 13                | 7                  |
| 14             | 34 | 18   | 0                                   | .                                                 | .              | 14                | 6                  |
| 15             | 35 | 18   | 0                                   | .250                                              | .097           | 15                | 5                  |
| 16             | 36 | 24   | 0                                   | .200                                              | .089           | 16                | 4                  |
| 17             | 37 | 36   | 0                                   | .150                                              | .080           | 17                | 3                  |
| 18             | 38 | 72   | 1                                   | .                                                 | .              | 17                | 2                  |
| 19             | 39 | 72   | 1                                   | .                                                 | .              | 17                | 1                  |
| 20             | 40 | 72   | 1                                   | .                                                 | .              | 17                | 0                  |
| BS27 1         | 41 | 8    | 0                                   | .900                                              | .067           | 1                 | 19                 |
| 2              | 42 | 10   | 0                                   | .850                                              | .080           | 2                 | 18                 |
| 3              | 43 | 12   | 0                                   | .                                                 | .              | 3                 | 17                 |
| 4              | 44 | 12   | 0                                   | .750                                              | .097           | 4                 | 16                 |
| 5              | 45 | 18   | 0                                   | .                                                 | .              | 5                 | 15                 |
| 6              | 46 | 18   | 0                                   | .                                                 | .              | 6                 | 14                 |
| 7              | 47 | 18   | 0                                   | .                                                 | .              | 7                 | 13                 |
| 8              | 48 | 18   | 0                                   | .                                                 | .              | 8                 | 12                 |
| 9              | 49 | 18   | 0                                   | .                                                 | .              | 9                 | 11                 |
| 10             | 50 | 18   | 0                                   | .                                                 | .              | 10                | 10                 |
| 11             | 51 | 18   | 0                                   | .                                                 | .              | 11                | 9                  |
| 12             | 52 | 18   | 0                                   | .                                                 | .              | 12                | 8                  |
| 13             | 53 | 18   | 0                                   | .                                                 | .              | 13                | 7                  |
| 14             | 54 | 18   | 0                                   | .300                                              | .102           | 14                | 6                  |
| 15             | 55 | 24   | 0                                   | .250                                              | .097           | 15                | 5                  |
| 16             | 56 | 72   | 1                                   | .                                                 | .              | 15                | 4                  |
| 17             | 57 | 72   | 1                                   | .                                                 | .              | 15                | 3                  |

| Survival table |    |      |                                     |                                                   |                |                   |                    |
|----------------|----|------|-------------------------------------|---------------------------------------------------|----------------|-------------------|--------------------|
|                | Id | Time | Status<br>(0: dead; 1:<br>survival) | Cumulative proportion of<br>survival at this time |                | Cumulative events | Remaining<br>cases |
|                |    |      |                                     | Estimate                                          | Standard error |                   |                    |
| 18             | 58 | 72   | 1                                   | .                                                 | .              | 15                | 2                  |
| 19             | 59 | 72   | 1                                   | .                                                 | .              | 15                | 1                  |
| 20             | 60 | 72   | 1                                   | .                                                 | .              | 15                | 0                  |
| P1-7 1         | 1  | 4    | 0                                   | .950                                              | .049           | 1                 | 19                 |
| 2              | 2  | 6    | 0                                   | .                                                 | .              | 2                 | 18                 |
| 3              | 3  | 6    | 0                                   | .                                                 | .              | 3                 | 17                 |
| 4              | 4  | 6    | 0                                   | .                                                 | .              | 4                 | 16                 |
| 5              | 5  | 6    | 0                                   | .                                                 | .              | 5                 | 15                 |
| 6              | 6  | 6    | 0                                   | .                                                 | .              | 6                 | 14                 |
| 7              | 7  | 6    | 0                                   | .                                                 | .              | 7                 | 13                 |
| 8              | 8  | 6    | 0                                   | .                                                 | .              | 8                 | 12                 |
| 9              | 9  | 6    | 0                                   | .                                                 | .              | 9                 | 11                 |
| 10             | 10 | 6    | 0                                   | .                                                 | .              | 10                | 10                 |
| 11             | 11 | 6    | 0                                   | .                                                 | .              | 11                | 9                  |
| 12             | 12 | 6    | 0                                   | .400                                              | .110           | 12                | 8                  |
| 13             | 13 | 8    | 0                                   | .                                                 | .              | 13                | 7                  |
| 14             | 14 | 8    | 0                                   | .                                                 | .              | 4                 | 6                  |
| 15             | 15 | 8    | 0                                   | .                                                 | .              | 15                | 5                  |
| 16             | 16 | 8    | 0                                   | .200                                              | .089           | 16                | 4                  |
| 17             | 17 | 18   | 0                                   | .150                                              | .080           | 17                | 3                  |
| 18             | 18 | 72   | 1                                   | .                                                 | .              | 17                | 2                  |
| 19             | 19 | 72   | 1                                   | .                                                 | .              | 17                | 1                  |
| 20             | 20 | 72   | 1                                   | .                                                 | .              | 17                | 0                  |

**Mean and median of survival table**

|       | average  |                |                         |             | median   |                |                         |             |
|-------|----------|----------------|-------------------------|-------------|----------|----------------|-------------------------|-------------|
|       | Estimate | Standard error | 95% confidence interval |             | Estimate | Standard error | 95% confidence interval |             |
|       |          |                | Lower limit             | Upper limit |          |                | Lower limit             | Upper limit |
| BS26  | 25.700   | 4.524          | 16.833                  | 34.567      | 18.000   | 1.056          | 15.930                  | 20.070      |
| BS27  | 29.700   | 5.536          | 18.850                  | 40.550      | 18.000   | 1.366          | 15.322                  | 20.678      |
| P1-7  | 16.800   | 5.220          | 6.569                   | 27.031      | 6.000    | .398           | 5.219                   | 6.781       |
| total | 24.067   | 3.032          | 18.125                  | 30.009      | 18.000   | .936           | 16.165                  | 19.835      |

a. If the estimate has been censored, it will be limited to the longest survival time.

**Overall comparison**

|                       |      | BS26     |      | BS27     |      | P1-7     |      |
|-----------------------|------|----------|------|----------|------|----------|------|
|                       |      | $\chi^2$ | Sig. | $\chi^2$ | Sig. | $\chi^2$ | Sig. |
| Log Rank (Mantel-Cox) | BS26 |          |      | .123.    | .726 | 7.334    | .007 |
|                       | BS27 | .123     | .726 |          |      | 8.005    | .005 |
|                       | P1-7 | 7.334    | .007 | 8.005    | .005 |          |      |
