# Supplementary material for: Investigation of the Genomic and Pathogenic Features of the Potentially Zoonotic Streptococcus parasuis
Source: MDPI journal article supplement (doi:10.3390/pathogens10070834), 2021-07-02
Supplement: s1 [file s1]

Table S1. Sequence similarity of 16S rRNA gene and housekeeping genes and ANI values among genomes that the present study used.

| No. | Strains                          | Sequence similarity (%) of 16S rRNA gene with strains No. |      |       |       |      |       |      |      |   |    |    |    |    |    |    |    |    |    |
|-----|----------------------------------|-----------------------------------------------------------|------|-------|-------|------|-------|------|------|---|----|----|----|----|----|----|----|----|----|
|     |                                  | 1                                                         | 2    | 3     | 4     | 5    | 6     | 7    | 8    | 9 | 10 | 11 | 12 | 13 | 14 | 15 | 16 | 17 | 18 |
| 1   | <i>S. parasuis</i><br>BS26       |                                                           |      |       |       |      |       |      |      |   |    |    |    |    |    |    |    |    |    |
| 2   | <i>S. parasuis</i><br>BS27       | 100.0                                                     |      |       |       |      |       |      |      |   |    |    |    |    |    |    |    |    |    |
| 3   | <i>S. parasuis</i><br>SUT-7      | 99.4                                                      | 99.4 |       |       |      |       |      |      |   |    |    |    |    |    |    |    |    |    |
| 4   | <i>S. parasuis</i><br>SUT-286    | 98.9                                                      | 98.9 | 99.2  |       |      |       |      |      |   |    |    |    |    |    |    |    |    |    |
| 5   | <i>S. parasuis</i><br>SUT-328    | 99.5                                                      | 99.5 | 99.2  | 99.2  |      |       |      |      |   |    |    |    |    |    |    |    |    |    |
| 6   | <i>S. parasuis</i> 86-<br>5192   | 98.9                                                      | 98.9 | 100.0 | 100.0 | 99.2 |       |      |      |   |    |    |    |    |    |    |    |    |    |
| 7   | <i>S. parasuis</i> 88-<br>1861   | 99.2                                                      | 99.2 | 99.2  | 99.2  | 99.6 | 99.1  |      |      |   |    |    |    |    |    |    |    |    |    |
| 8   | <i>S. parasuis</i> 89-<br>4109-1 | 98.9                                                      | 98.9 | 100.0 | 100.0 | 99.2 | 100.0 | 99.5 |      |   |    |    |    |    |    |    |    |    |    |
| 9   | <i>S. parasuis</i><br>4253       | 99.3                                                      | 99.3 | 99.5  | 99.5  | 99.0 | 99.5  | 98.8 | 99.5 |   |    |    |    |    |    |    |    |    |    |

|    |                                 |      |      |       |       |      |       |       |       |      |      |       |      |      |      |      |      |      |
|----|---------------------------------|------|------|-------|-------|------|-------|-------|-------|------|------|-------|------|------|------|------|------|------|
| 10 | <i>S. parasuis</i><br>2674      | 99.2 | 99.2 | 99.2  | 99.2  | 99.6 | 99.1  | 100.0 | 99.1  | 99.1 |      |       |      |      |      |      |      |      |
| 11 | <i>S. parasuis</i> 10-<br>36905 | 98.9 | 98.9 | 100.0 | 100.0 | 99.2 | 100.0 | 99.5  | 99.5  | 99.5 | 99.6 |       |      |      |      |      |      |      |
| 12 | <i>S. parasuis</i><br>SUT-447   | 99.6 | 99.6 | 98.8  | 98.8  | 99.3 | 98.8  | 99.1  | 98.8  | 98.9 | 99.1 | 98.8  |      |      |      |      |      |      |
| 13 | <i>S. parasuis</i><br>SUT-462   | 98.9 | 98.9 | 100.0 | 100.0 | 99.2 | 100.0 | 99.1  | 100.0 | 99.5 | 99.1 | 100.0 | 98.8 |      |      |      |      |      |
| 14 | <i>S. parasuis</i><br>SUT-479   | 99.4 | 99.4 | 99.3  | 99.3  | 99.9 | 99.3  | 99.7  | 99.3  | 98.9 | 99.7 | 99.3  | 99.4 | 99.3 |      |      |      |      |
| 15 | <i>S. parasuis</i><br>SUT-481   | 98.9 | 98.9 | 99.9  | 99.9  | 99.2 | 99.9  | 99.1  | 99.9  | 99.5 | 99.1 | 99.9  | 98.8 | 99.9 | 99.4 |      |      |      |
| 16 | <i>S. parasuis</i><br>SUT-483   | 99.1 | 99.1 | 99.6  | 99.6  | 99.6 | 99.6  | 99.2  | 99.6  | 99.1 | 99.2 | 99.6  | 99.0 | 99.6 | 99.5 | 99.5 |      |      |
| 17 | <i>S. suis</i><br>NCTC10234     | 96.6 | 96.6 | 97.6  | 97.6  | 97.0 | 97.6  | 97.1  | 97.1  | 97.1 | 97.3 | 97.6  | 96.5 | 97.6 | 97.0 | 97.6 | 97.3 |      |
| 18 | <i>E. faecalis</i><br>JCM_5803  | 89.1 | 89.1 | 89.1  | 89.1  | 88.9 | 89.4  | 89.3  | 89.3  | 89.3 | 89.3 | 89.4  | 88.9 | 89.4 | 89.3 | 89.5 | 89.3 | 89.1 |

---

| No. | Strains                         | Sequence similarity (%) of <i>groEL</i> with strains No. |      |      |      |       |       |      |       |      |    |    |    |    |    |
|-----|---------------------------------|----------------------------------------------------------|------|------|------|-------|-------|------|-------|------|----|----|----|----|----|
|     |                                 | 1                                                        | 2    | 3    | 4    | 5     | 6     | 7    | 8     | 9    | 10 | 11 | 12 | 13 | 14 |
| 1   | <i>S. parasuis</i><br>BS26      |                                                          |      |      |      |       |       |      |       |      |    |    |    |    |    |
| 2   | <i>S. parasuis</i><br>BS27      | 100.0                                                    |      |      |      |       |       |      |       |      |    |    |    |    |    |
| 3   | <i>S. parasuis</i><br>SUT-7     | 96.9                                                     | 96.9 |      |      |       |       |      |       |      |    |    |    |    |    |
| 4   | <i>S. parasuis</i><br>SUT-286   | 97.6                                                     | 97.6 | 97.8 |      |       |       |      |       |      |    |    |    |    |    |
| 5   | <i>S. parasuis</i><br>SUT-319   | 94.2                                                     | 94.2 | 94.4 | 95.0 |       |       |      |       |      |    |    |    |    |    |
| 6   | <i>S. parasuis</i><br>SUT-328   | 94.2                                                     | 94.2 | 94.4 | 95.0 | 100.0 |       |      |       |      |    |    |    |    |    |
| 7   | <i>S. parasuis</i><br>SUT-380   | 94.2                                                     | 94.2 | 94.4 | 95.0 | 100.0 | 100.0 |      |       |      |    |    |    |    |    |
| 8   | <i>S. parasuis</i><br>86-5192   | 96.0                                                     | 96.0 | 96.0 | 96.9 | 94.0  | 94.0  | 94.0 |       |      |    |    |    |    |    |
| 9   | <i>S. parasuis</i><br>88-1861   | 96.1                                                     | 96.1 | 96.2 | 96.9 | 94.2  | 94.2  | 94.2 | 99.5  |      |    |    |    |    |    |
| 10  | <i>S. parasuis</i><br>89-4109-1 | 96.0                                                     | 96.0 | 96.0 | 96.9 | 94.0  | 94.0  | 94.0 | 100.0 | 99.5 |    |    |    |    |    |

|    |                                |      |      |      |      |      |      |      |       |      |       |      |      |      |
|----|--------------------------------|------|------|------|------|------|------|------|-------|------|-------|------|------|------|
| 11 | <i>S. parasuis</i><br>4253     | 98.4 | 98.4 | 97.2 | 97.8 | 94.4 | 94.4 | 94.4 | 96.2  | 96.5 | 96.2  |      |      |      |
| 12 | <i>S. parasuis</i><br>2674     | 94.2 | 94.2 | 94.6 | 95.1 | 99.7 | 99.7 | 99.7 | 94.0  | 94.3 | 94.0  | 94.5 |      |      |
| 13 | <i>S. parasuis</i><br>10-36905 | 96.0 | 96.0 | 96.0 | 96.9 | 94.0 | 94.0 | 94.0 | 100.0 | 99.5 | 100.0 | 96.2 | 94.0 |      |
| 14 | <i>S. suis</i><br>NCTC10234    | 91.5 | 91.5 | 92.0 | 91.6 | 93.0 | 93.0 | 93.0 | 91.9  | 91.7 | 91.9  | 91.4 | 93.0 | 91.9 |

|     |                               | Sequence similarity (%) of <i>gryB</i> with strains No. |      |      |      |       |   |   |   |   |    |    |    |    |    |
|-----|-------------------------------|---------------------------------------------------------|------|------|------|-------|---|---|---|---|----|----|----|----|----|
| No. | Strains                       | 1                                                       | 2    | 3    | 4    | 5     | 6 | 7 | 8 | 9 | 10 | 11 | 12 | 13 | 14 |
| 1   | <i>S. parasuis</i><br>BS26    |                                                         |      |      |      |       |   |   |   |   |    |    |    |    |    |
| 2   | <i>S. parasuis</i><br>BS27    | 100.0                                                   |      |      |      |       |   |   |   |   |    |    |    |    |    |
| 3   | <i>S. parasuis</i><br>SUT-7   | 97.5                                                    | 97.5 |      |      |       |   |   |   |   |    |    |    |    |    |
| 4   | <i>S. parasuis</i><br>SUT-286 | 97.6                                                    | 97.6 | 97.3 |      |       |   |   |   |   |    |    |    |    |    |
| 5   | <i>S. parasuis</i><br>SUT-319 | 97.6                                                    | 97.6 | 98.4 | 97.6 |       |   |   |   |   |    |    |    |    |    |
| 6   | <i>S. parasuis</i><br>SUT-328 | 97.6                                                    | 97.6 | 98.4 | 97.6 | 100.0 |   |   |   |   |    |    |    |    |    |

|    |                                 |      |      |      |      |      |      |      |      |      |      |      |      |      |  |
|----|---------------------------------|------|------|------|------|------|------|------|------|------|------|------|------|------|--|
| 7  | <i>S. parasuis</i><br>SUT-380   | 98.0 | 98.0 | 97.9 | 98.1 | 98.6 | 98.6 |      |      |      |      |      |      |      |  |
| 8  | <i>S. parasuis</i><br>86-5192   | 97.8 | 97.8 | 97.7 | 97.8 | 98.2 | 98.2 | 99.6 |      |      |      |      |      |      |  |
| 9  | <i>S. parasuis</i><br>88-1861   | 97.5 | 97.5 | 97.9 | 98.1 | 98.0 | 98.0 | 98.3 | 97.8 |      |      |      |      |      |  |
| 10 | <i>S. parasuis</i><br>89-4109-1 | 97.5 | 97.5 | 98.3 | 97.3 | 99.1 | 99.1 | 99.0 | 98.6 | 98.1 |      |      |      |      |  |
| 11 | <i>S. parasuis</i><br>4253      | 99.1 | 99.1 | 97.2 | 97.4 | 97.2 | 97.2 | 97.8 | 97.7 | 97.2 | 97.4 |      |      |      |  |
| 12 | <i>S. parasuis</i><br>2674      | 97.3 | 97.3 | 97.4 | 98.9 | 97.7 | 97.7 | 98.1 | 97.8 | 98.5 | 97.6 | 97.0 |      |      |  |
| 13 | <i>S. parasuis</i><br>10-36905  | 97.5 | 97.5 | 97.2 | 99.4 | 97.5 | 97.5 | 98.2 | 98.0 | 98.2 | 97.5 | 97.2 | 97.2 |      |  |
| 14 | <i>S. suis</i><br>NCTC10234     | 83.9 | 83.9 | 84.1 | 84.1 | 84.1 | 84.1 | 84.3 | 84.3 | 84.1 | 84.2 | 83.7 | 83.7 | 84.1 |  |

---

|     |                            | Sequence similarity (%) of <i>sodA</i> with strains No. |   |   |   |   |   |   |   |   |    |    |    |    |    |
|-----|----------------------------|---------------------------------------------------------|---|---|---|---|---|---|---|---|----|----|----|----|----|
| No. | Strains                    | 1                                                       | 2 | 3 | 4 | 5 | 6 | 7 | 8 | 9 | 10 | 11 | 12 | 13 | 14 |
| 1   | <i>S. parasuis</i><br>BS26 |                                                         |   |   |   |   |   |   |   |   |    |    |    |    |    |

|    |                                 |       |      |       |      |       |      |       |      |      |      |      |      |      |
|----|---------------------------------|-------|------|-------|------|-------|------|-------|------|------|------|------|------|------|
| 2  | <i>S. parasuis</i><br>BS27      | 100.0 |      |       |      |       |      |       |      |      |      |      |      |      |
| 3  | <i>S. parasuis</i><br>SUT-7     | 96.9  | 96.9 |       |      |       |      |       |      |      |      |      |      |      |
| 4  | <i>S. parasuis</i><br>SUT-286   | 98.7  | 98.7 | 97.5  |      |       |      |       |      |      |      |      |      |      |
| 5  | <i>S. parasuis</i><br>SUT-319   | 98.5  | 98.5 | 97.4  | 98.8 |       |      |       |      |      |      |      |      |      |
| 6  | <i>S. parasuis</i><br>SUT-328   | 98.5  | 98.5 | 97.4  | 98.8 | 100.0 |      |       |      |      |      |      |      |      |
| 7  | <i>S. parasuis</i><br>SUT-380   | 98.2  | 98.2 | 97.4  | 98.8 | 99.0  | 99.0 |       |      |      |      |      |      |      |
| 8  | <i>S. parasuis</i><br>86-5192   | 97.5  | 97.5 | 98.7  | 98.5 | 97.7  | 97.7 | 100.0 |      |      |      |      |      |      |
| 9  | <i>S. parasuis</i><br>88-1861   | 96.9  | 96.9 | 99.7  | 97.5 | 97.4  | 97.4 | 98.7  | 98.7 |      |      |      |      |      |
| 10 | <i>S. parasuis</i><br>89-4109-1 | 96.7  | 96.7 | 99.8  | 97.4 | 97.2  | 97.2 | 97.2  | 98.5 | 99.5 |      |      |      |      |
| 11 | <i>S. parasuis</i><br>4253      | 99.3  | 99.3 | 96.9  | 98.7 | 98.5  | 98.5 | 98.5  | 97.5 | 96.9 | 96.7 |      |      |      |
| 12 | <i>S. parasuis</i><br>2647      | 97.9  | 97.9 | 98.4  | 98.5 | 98.4  | 98.4 | 98.4  | 97.7 | 97.5 | 97.9 | 97.9 |      |      |
| 13 | <i>S. parasuis</i><br>10-36905  | 96.9  | 96.9 | 100.0 | 97.5 | 97.4  | 97.4 | 97.4  | 98.7 | 99.7 | 99.8 | 96.9 | 97.7 |      |
| 14 | <i>S. suis</i><br>NCTC10234     | 83.0  | 83.0 | 84.7  | 84.0 | 84.0  | 84.0 | 84.0  | 84.3 | 84.3 | 84.5 | 83.0 | 84.0 | 84.7 |

---

| No. | Strains                         | Sequence similarity (%) of <i>recN</i> with strains No. |      |      |      |       |       |      |       |      |      |      |      |    |    |    |    |    |    |    |    |    |    |    |    |    |    |
|-----|---------------------------------|---------------------------------------------------------|------|------|------|-------|-------|------|-------|------|------|------|------|----|----|----|----|----|----|----|----|----|----|----|----|----|----|
|     |                                 | 1                                                       | 2    | 3    | 4    | 5     | 6     | 7    | 8     | 9    | 10   | 11   | 12   | 13 | 14 | 15 | 16 | 17 | 18 | 19 | 20 | 21 | 22 | 23 | 24 | 25 | 26 |
| 1   | <i>S. parasuis</i><br>BS26      |                                                         |      |      |      |       |       |      |       |      |      |      |      |    |    |    |    |    |    |    |    |    |    |    |    |    |    |
| 2   | <i>S. parasuis</i><br>BS27      | 100.0                                                   |      |      |      |       |       |      |       |      |      |      |      |    |    |    |    |    |    |    |    |    |    |    |    |    |    |
| 3   | <i>S. parasuis</i><br>SUT-7     | 98.3                                                    | 98.3 |      |      |       |       |      |       |      |      |      |      |    |    |    |    |    |    |    |    |    |    |    |    |    |    |
| 4   | <i>S. parasuis</i><br>SUT-286   | 97.4                                                    | 97.4 | 97.4 |      |       |       |      |       |      |      |      |      |    |    |    |    |    |    |    |    |    |    |    |    |    |    |
| 5   | <i>S. parasuis</i><br>SUT-319   | 98.4                                                    | 98.4 | 99.6 | 97.5 |       |       |      |       |      |      |      |      |    |    |    |    |    |    |    |    |    |    |    |    |    |    |
| 6   | <i>S. parasuis</i><br>SUT-328   | 98.4                                                    | 98.4 | 99.6 | 97.5 | 100.0 |       |      |       |      |      |      |      |    |    |    |    |    |    |    |    |    |    |    |    |    |    |
| 7   | <i>S. parasuis</i><br>SUT-380   | 98.4                                                    | 98.4 | 99.6 | 97.5 | 100.0 | 100.0 |      |       |      |      |      |      |    |    |    |    |    |    |    |    |    |    |    |    |    |    |
| 8   | <i>S. parasuis</i><br>86-5192   | 97.3                                                    | 97.3 | 97.3 | 99.6 | 97.4  | 97.4  | 97.4 |       |      |      |      |      |    |    |    |    |    |    |    |    |    |    |    |    |    |    |
| 9   | <i>S. parasuis</i><br>88-1861   | 97.5                                                    | 97.5 | 97.8 | 98.9 | 97.8  | 97.8  | 97.8 | 98.7  |      |      |      |      |    |    |    |    |    |    |    |    |    |    |    |    |    |    |
| 10  | <i>S. parasuis</i><br>89-4109-1 | 97.3                                                    | 97.3 | 97.3 | 99.2 | 97.4  | 97.4  | 97.4 | 99.2  | 98.9 |      |      |      |    |    |    |    |    |    |    |    |    |    |    |    |    |    |
| 11  | <i>S. parasuis</i><br>4253      | 99.0                                                    | 99.0 | 98.4 | 97.7 | 98.5  | 98.5  | 98.5 | 97.6  | 97.8 | 97.6 |      |      |    |    |    |    |    |    |    |    |    |    |    |    |    |    |
| 12  | <i>S. parasuis</i><br>2674      | 97.6                                                    | 97.6 | 98.3 | 97.4 | 98.3  | 98.3  | 98.3 | 97.3  | 97.4 | 97.1 | 97.8 |      |    |    |    |    |    |    |    |    |    |    |    |    |    |    |
| 13  | <i>S. parasuis</i><br>10-36905  | 97.3                                                    | 97.3 | 97.3 | 99.6 | 97.4  | 97.4  | 97.4 | 100.0 | 98.7 | 99.2 | 97.6 | 97.3 |    |    |    |    |    |    |    |    |    |    |    |    |    |    |





|     |                                | ANI values with strains No. |       |       |       |       |       |       |       |       |       |       |    |    |    |
|-----|--------------------------------|-----------------------------|-------|-------|-------|-------|-------|-------|-------|-------|-------|-------|----|----|----|
| No. | Strains                        | 1                           | 2     | 3     | 4     | 5     | 6     | 7     | 8     | 9     | 10    | 11    | 12 | 13 | 14 |
| 1   | <i>S.parasuis</i><br>BS26      |                             |       |       |       |       |       |       |       |       |       |       |    |    |    |
| 2   | <i>S.parasuis</i><br>BS27      | 99.98                       |       |       |       |       |       |       |       |       |       |       |    |    |    |
| 3   | <i>S.parasuis</i><br>SUT-7     | 93.98                       | 94.13 |       |       |       |       |       |       |       |       |       |    |    |    |
| 4   | <i>S.parasuis</i><br>SUT-286   | 95.1                        | 95.2  | 94.96 |       |       |       |       |       |       |       |       |    |    |    |
| 5   | <i>S.parasuis</i><br>SUT-319   | 95.3                        | 95.23 | 95.15 | 96.44 |       |       |       |       |       |       |       |    |    |    |
| 6   | <i>S.parasuis</i><br>SUT-328   | 95.31                       | 95.33 | 95.14 | 96.58 | 99.99 |       |       |       |       |       |       |    |    |    |
| 7   | <i>S.parasuis</i><br>SUT-380   | 95.26                       | 95.28 | 94.97 | 96.65 | 99.45 | 99.44 |       |       |       |       |       |    |    |    |
| 8   | <i>S.parasuis</i><br>86-5192   | 95.14                       | 95.04 | 94.3  | 97    | 96.06 | 96.05 | 96.22 |       |       |       |       |    |    |    |
| 9   | <i>S.parasuis</i><br>88-1861   | 93.86                       | 93.8  | 94.7  | 95.32 | 94.87 | 94.78 | 94.63 | 95.09 |       |       |       |    |    |    |
| 10  | <i>S.parasuis</i><br>89-4109-1 | 95.28                       | 95.19 | 94.52 | 97.2  | 96.02 | 96.04 | 95.88 | 97.25 | 95.17 |       |       |    |    |    |
| 11  | <i>S.parasuis</i><br>4253      | 97.79                       | 97.77 | 94.06 | 94.86 | 95.14 | 95.21 | 95.13 | 94.93 | 93.45 | 94.92 |       |    |    |    |
| 12  | <i>S.parasuis</i><br>2674      | 94.02                       | 94.02 | 95.13 | 95.63 | 95    | 95    | 94.99 | 95.93 | 95.35 | 95.4  | 93.92 |    |    |    |

|    |                               |       |       |       |       |       |       |       |       |       |       |       |       |       |
|----|-------------------------------|-------|-------|-------|-------|-------|-------|-------|-------|-------|-------|-------|-------|-------|
| 13 | <i>S.parasuis</i><br>10-36905 | 95    | 95    | 94.37 | 97.2  | 95.67 | 95.74 | 95.75 | 97.42 | 95.25 | 97.48 | 94.62 | 95.75 |       |
| 14 | <i>S.suis</i><br>NCTC10234    | 83.42 | 83.33 | 84.72 | 84.57 | 84.5  | 84.5  | 84.75 | 84.32 | 84.5  | 84.11 | 84.36 | 84.58 | 84.48 |
